# Supplementary material
Source: publisher figshare collection journal article supplement (https://springernature.figshare.com/ndownloader/files/14073503)

**A**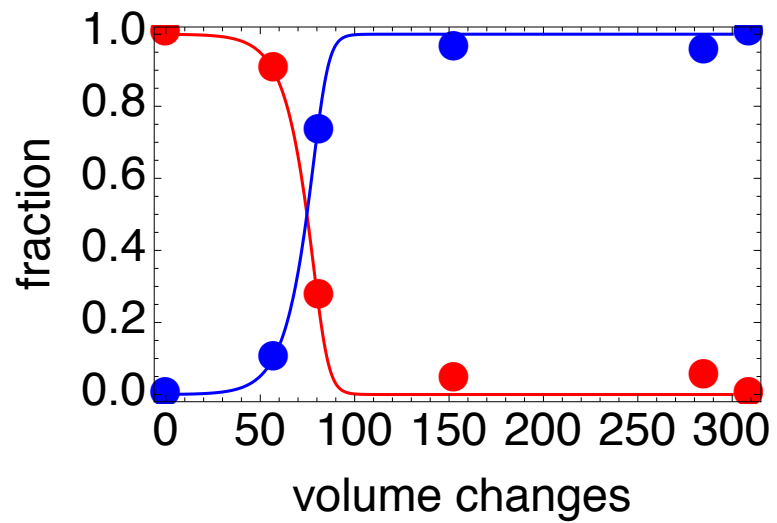**B**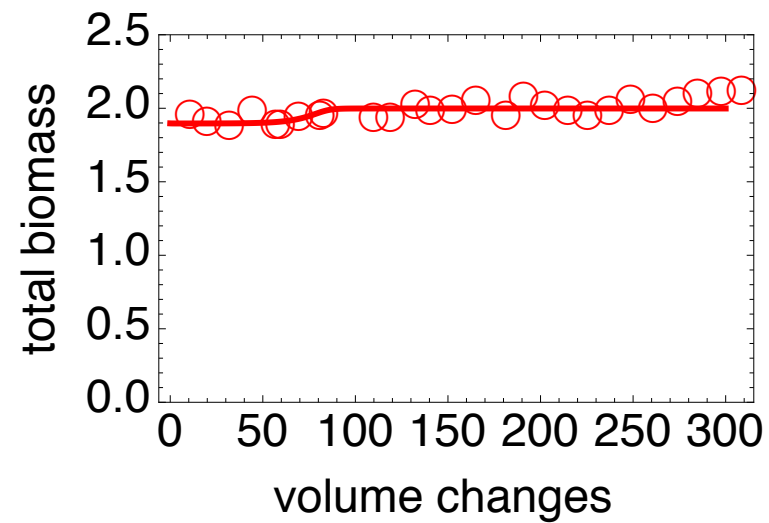**C**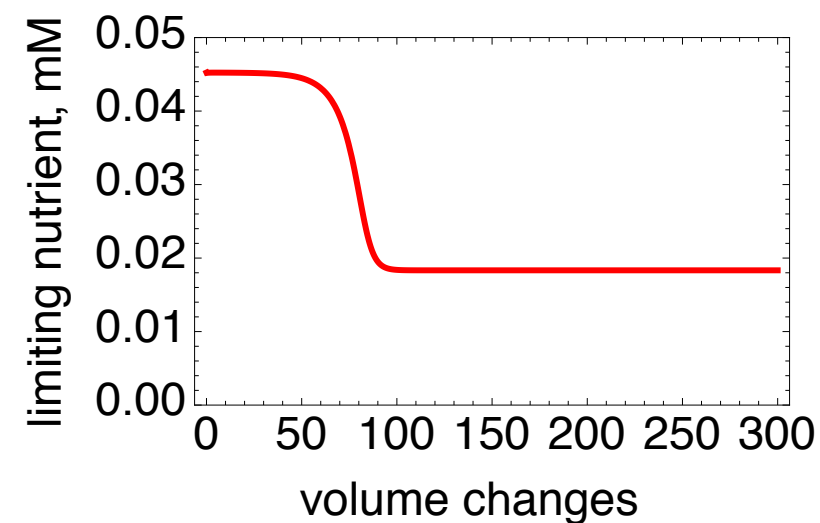**D**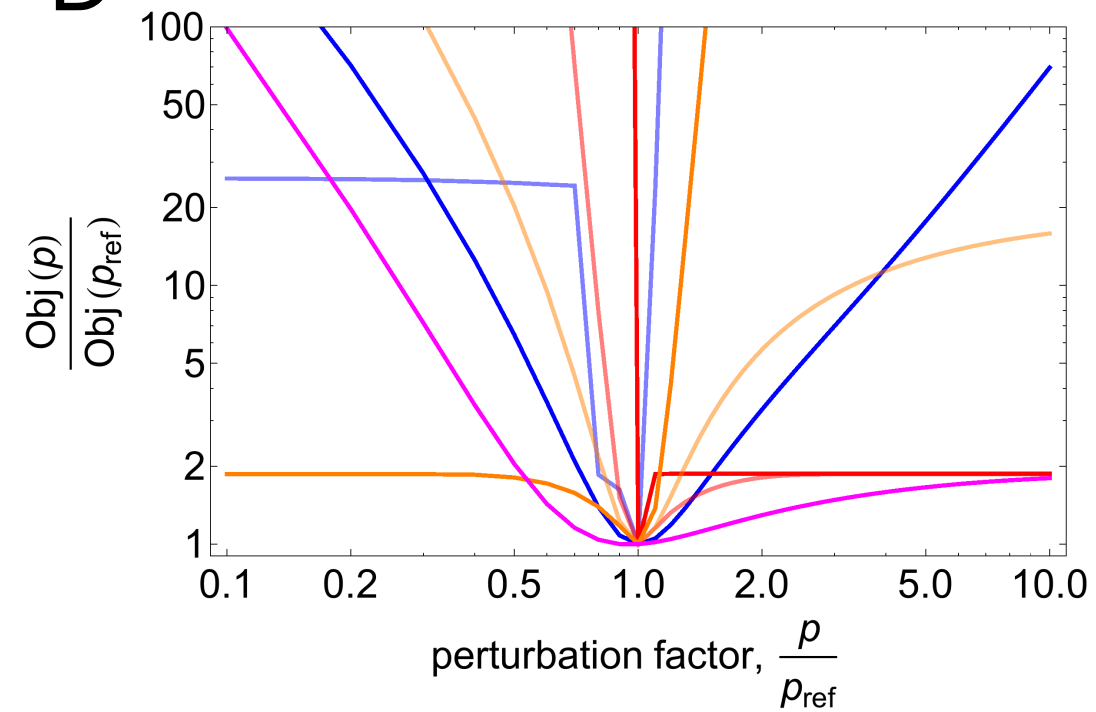**E**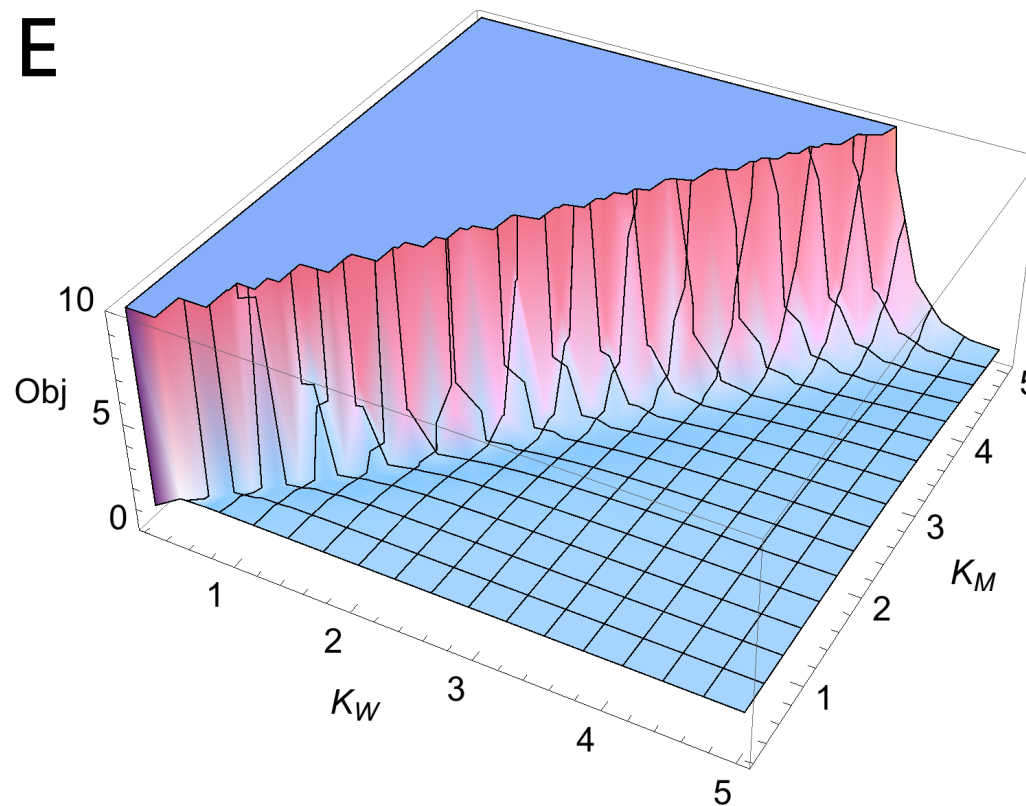

Supplement: Supplementary file 1 [file 14073503]
